# Supplementary material for: Identifying the crosstalk of dysfunctional pathways mediated by lncRNAs in breast cancer subtypes
Source: Royal Society of Chemistry journal article supplement (doi:10.1039/c5mb00700c), 2016-01-04
Supplement: c5mb00700c1.zip [file Supplementary_Figure_Legends.doc]

**Supplementary Figure Legends**

**Figure S1.** Crosstalking pathway networks mediated by lncRNAs in different breast cancer subtypes. LncRNA-mediated crosstalking pathway networks in breast cancer luminal A (A) and Her2 (B). Node size is proportional to the degree of the node. Red nodes, overexpressed lncRNAs; green nodes, underexpressed lncRNAs; blue ovals, pathways. The degree distribution of the 10 highest degree lncRNAs was shown on the right of networks. The GO biological processes enriched by the lncRNA-associated genes.

**Figure S2.** Key lncRNAs mediating the crosstalk of pathways in luminal A and Her2 breast cancer subtypes. (A) seven key lncRNAs mediate the crosstalk of “Tight junction” and “pathway in cancer” in the luminal A subtype; (B) twelve key lncRNAs mediate the crosstalk of “Focal adhesion” and “cell cycle” in the HER2 subtype. Each ellipse represents a gene in KEGG pathway. Purple Pentagram indicates drug molecule. Each diamond indicates a lncRNA. Red indicates overexpressed mRNAs or lncRNAs and green indicates underexpressed mRNAs or lncRNAs.

**Figure S3.** Key lncRNAs mediating the crosstalk of pathways in LumA breast cancer subtype. (A) six key lncRNAs mediate the crosstalk of “Prostate cancer” and “Tight junction” in the LumA subtype; (B) eight key lncRNAs mediate the crosstalk of “MAPK Signaling pathway” and “Wnt Signaling pathway” in the LumA subtype. Each ellipse represents a gene in KEGG pathway. Purple Pentagram indicates drug molecule. Each diamondes indicates a lncRNA. Red indicates overexpressed mRNAs or lncRNAs and green indicates underexpressed mRNAs or lncRNAs.

**Figure S4.** Key lncRNAs mediating the crosstalk of pathways in LumB breast cancer subtype. (A) six key lncRNAs mediate the crosstalk of “ERBB Signaling pathway” and “Wnt Signaling pathway” in the LumB subtype; (B) five key lncRNAs mediate the crosstalk of “Focal adhesion” and “Cell cycle” in the LumB subtype. Each ellipse represents a gene in KEGG pathway. Purple Pentagram indicates drug molecule. Each diamondes indicates a lncRNA. Red indicates overexpressed mRNAs or lncRNAs and green indicates underexpressed mRNAs or lncRNAs.

**Figure S5.** Key lncRNAs mediating the crosstalk of pathways in Her2 breast cancer subtype. (A) twelve key lncRNAs mediate the crosstalk of “Pathway in cancer” and “Cell cycle” in the Her2 subtype; (B) nine key lncRNAs mediate the crosstalk of “Insulin Signaling pathway” and “Cell cycle” in the Her2 subtype. Each ellipse represents a gene in KEGG pathway. Purple Pentagram indicates drug molecule. Each diamondes indicates a lncRNA. Red indicates overexpressed mRNAs or lncRNAs and green indicates underexpressed mRNAs or lncRNAs.

**Figure S6.** Key lncRNAs mediating the crosstalk of pathways in Basal-like breast cancer subtype. (A) five key lncRNAs mediate the crosstalk of “p53 signaling pathway” and “Pathway in cancer” in the Basal-like subtype; (B) nine key lncRNAs mediate the crosstalk of “Focal adhesion” and “Cell cycle” in the Basal-like subtype. Each ellipse represents a gene in KEGG pathway. Purple Pentagram indicates drug molecule. Each diamondes indicates a lncRNA. Red indicates overexpressed mRNAs or lncRNAs and green indicates underexpressed mRNAs or lncRNAs.
