# Supplementary material for: Identifying the crosstalk of dysfunctional pathways mediated by lncRNAs in breast cancer subtypes
Source: Royal Society of Chemistry journal article supplement (doi:10.1039/c5mb00700c), 2016-01-04
Supplement: c5mb00700c1.zip [file Supplementary_FigureS6.pdf › Supplementary_FigureS6.pdf]

**B** Basal-like

**Focal adhesion**

**Cell cycle**

Legend:

- overexpressed mRNA
- underexpressed mRNA
- overexpressed lncRNA
- underexpressed lncRNA
- drug
