# Supplementary material for: Identifying the crosstalk of dysfunctional pathways mediated by lncRNAs in breast cancer subtypes
Source: Royal Society of Chemistry journal article supplement (doi:10.1039/c5mb00700c), 2016-01-04
Supplement: c5mb00700c1.zip [file Supplementary_Table_S1.xls]

## Sheet: LumA_pathway
Pathway enrichment analysis(LumA subtype)
pathwayId	pathwayName	Benjamini–Hochberg FDR
path:04510_1	Focal adhesion	9.68e-10
path:03320_1	PPAR signaling pathway	1.22e-08
path:04010_1	MAPK signaling pathway	1.22e-08
path:05200_2	Pathways in cancer_1	1.22e-08
path:04610_1	Complement and coagulation cascades	6.31e-08
path:04910_1	Insulin signaling pathway	6.72e-07
path:04062_1	Chemokine signaling pathway	5.78e-06
path:04520_2	Adherens junction	1.81e-05
path:04630_1	Jak-STAT signaling pathway	2.77e-05
path:05215_2	Prostate cancer	2.77e-05
path:04020_1	Calcium signaling pathway	3.5e-05
path:00601_1	Glycosphingolipid biosynthesis - lacto and neolacto series	3.5e-05
path:04530_1	Tight junction	3.5e-05
path:04012_1	ErbB signaling pathway	4.93e-05
path:00280_1	Valine, leucine and isoleucine degradation	9.89e-05
path:05223_3	Non-small cell lung cancer	0.000105983
path:04310_3	Wnt signaling pathway	0.000112263
path:00360_1	Phenylalanine metabolism	0.000216074
path:05200_12	Pathways in cancer_2	0.00027441
path:00350_1	Tyrosine metabolism	0.000323431
path:04270_3	Vascular smooth muscle contraction	0.000340706
path:04920_1	Adipocytokine signaling pathway	0.000340706
path:04620_1	Toll-like receptor signaling pathway	0.00034904
path:04115_1	p53 signaling pathway	0.000555836
path:05150_1	Staphylococcus aureus infection	0.000730732
path:05221_1	Acute myeloid leukemia	0.000730732
path:00830_1	Retinol metabolism	0.000730732
path:04110_1	Cell cycle	0.000732027
