# Supplementary material for: Identifying the crosstalk of dysfunctional pathways mediated by lncRNAs in breast cancer subtypes
Source: Royal Society of Chemistry journal article supplement (doi:10.1039/c5mb00700c), 2016-01-04
Supplement: c5mb00700c1.zip [file Supplementary_Table_S2.xls]

## Sheet: LumB_pathway
Pathway enrichment analysis(LumB subtype)
pathwayId	pathwayName	Benjamini–Hochberg FDR
path:05200_4	Pathways in cancer_1	1.09e-12
path:04510_1	Focal adhesion	2.43e-12
path:04530_1	Tight junction	7.61e-10
path:04010_1	MAPK signaling pathway	1.12e-08
path:05215_2	Prostate cancer	3.78e-08
path:04512_9	ECM-receptor interaction_1	6.89e-08
path:04110_2	Cell cycle	1.38e-07
path:04660_2	T cell receptor signaling pathway	1.01e-06
path:04512_6	ECM-receptor interaction_2	1.06e-06
path:04910_1	Insulin signaling pathway	1.12e-06
path:04012_1	ErbB signaling pathway	1.12e-06
path:04115_1	p53 signaling pathway	1.24e-06
path:05221_1	Acute myeloid leukemia	1.8e-06
path:04310_3	Wnt signaling pathway_1	2.06e-06
path:05222_2	Small cell lung cancer	3.49e-06
path:04610_1	Complement and coagulation cascades	1.2e-05
path:04662_1	B cell receptor signaling pathway	1.2e-05
path:04062_1	Chemokine signaling pathway	1.66e-05
path:00330_1	Arginine and proline metabolism	1.9e-05
path:05200_17	Pathways in cancer_2	2.34e-05
path:03320_1	PPAR signaling pathway	4.33e-05
path:04722_1	Neurotrophin signaling pathway	4.51e-05
path:05217_1	Basal cell carcinoma	4.51e-05
path:00260_2	Glycine, serine and threonine metabolism	7.54e-05
path:04630_1	Jak-STAT signaling pathway	9.27e-05
path:04512_12	ECM-receptor interaction_3	9.6e-05
path:00360_1	Phenylalanine metabolism	0.00010592
path:04916_4	Melanogenesis	0.000141872
path:04666_1	Fc gamma R-mediated phagocytosis	0.000155918
path:00350_1	Tyrosine metabolism	0.000191365
path:00601_1	Glycosphingolipid biosynthesis - lacto and neolacto series	0.000221184
path:00250_1	Alanine, aspartate and glutamate metabolism	0.000224208
path:05214_1	Glioma	0.00029351
path:04310_1	Wnt signaling pathway_2	0.000353846
path:04810_1	Regulation of actin cytoskeleton	0.00036819
path:04920_1	Adipocytokine signaling pathway	0.000397237
path:04620_1	Toll-like receptor signaling pathway	0.000457652
path:04310_2	Wnt signaling pathway_3	0.000457652
path:00270_1	Cysteine and methionine metabolism	0.000487541
path:04340_1	Hedgehog signaling pathway	0.000576642
path:04514_40	Cell adhesion molecules (CAMs)	0.000617692
path:00280_1	Valine, leucine and isoleucine degradation	0.000655646
path:00230_1	Purine metabolism	0.000655646
path:04520_3	Adherens junction	0.000712221
