# Supplementary material for: Identifying the crosstalk of dysfunctional pathways mediated by lncRNAs in breast cancer subtypes
Source: Royal Society of Chemistry journal article supplement (doi:10.1039/c5mb00700c), 2016-01-04
Supplement: c5mb00700c1.zip [file Supplementary_Table_S3.xls]

## Sheet: Her2_pathway
Pathway enrichment analysis(Her2 subtype)
pathwayId	pathwayName	Benjamini–Hochberg FDR
path:04510_1	Focal adhesion	1.88e-12
path:04110_1	Cell cycle	2e-12
path:05200_4	Pathways in cancer	1.2e-10
path:03320_1	PPAR signaling pathway	6.09e-10
path:04610_1	Complement and coagulation cascades	7.13e-09
path:04662_1	B cell receptor signaling pathway	1.41e-06
path:04010_1	MAPK signaling pathway	3.5e-06
path:05215_2	Prostate cancer	3.5e-06
path:04666_1	Fc gamma R-mediated phagocytosis	3.5e-06
path:04062_1	Chemokine signaling pathway	4e-06
path:05200_16	Pathways in cancer	4.94e-06
path:04012_1	ErbB signaling pathway	2.39e-05
path:04115_1	p53 signaling pathway	2.39e-05
path:04512_6	ECM-receptor interaction	2.39e-05
path:00520_1	Amino sugar and nucleotide sugar metabolism	2.77e-05
path:04310_3	Wnt signaling pathway	2.77e-05
path:04620_1	Toll-like receptor signaling pathway	3.58e-05
path:04910_1	Insulin signaling pathway	5.36e-05
path:05218_4	Melanoma	8.94e-05
path:04810_1	Regulation of actin cytoskeleton	9.93e-05
path:04530_1	Tight junction	0.000100427
path:04360_4	Axon guidance	0.000100427
path:00350_4	Tyrosine metabolism	0.000115491
path:04722_1	Neurotrophin signaling pathway	0.000141769
path:00360_1	Phenylalanine metabolism	0.000152288
path:05221_1	Acute myeloid leukemia	0.000152288
path:05210_3	Colorectal cancer	0.000165984
path:00010_1	Glycolysis / Gluconeogenesis	0.000165984
path:00601_1	Glycosphingolipid biosynthesis - lacto and neolacto series	0.000241971
path:04520_2	Adherens junction	0.000296621
path:04114_1	Oocyte meiosis	0.000296621
path:05200_7	Pathways in cancer	0.000333009
path:04920_1	Adipocytokine signaling pathway	0.000365122
path:05150_1	Staphylococcus aureus infection	0.000380462
path:05214_1	Glioma	0.000521428
path:04350_5	TGF-beta signaling pathway	0.000529965
path:00051_1	Fructose and mannose metabolism	0.000706653
path:04660_4	T cell receptor signaling pathway	0.000799605
path:00330_1	Arginine and proline metabolism	0.000799605
