# Supplementary material for: Identifying the crosstalk of dysfunctional pathways mediated by lncRNAs in breast cancer subtypes
Source: Royal Society of Chemistry journal article supplement (doi:10.1039/c5mb00700c), 2016-01-04
Supplement: c5mb00700c1.zip [file Supplementary_Table_S4.xlsx]

## Sheet: Supplementary Table S4
Pathway enrichment analysis(Basal-like subtype)
pathwayId	pathwayName	Benjamini–Hochberg FDR
path:04110_1	Cell cycle	1.85e-10
path:04062_1	Chemokine signaling pathway	9.36e-08
path:04510_1	Focal adhesion	9.36e-08
path:04620_1	Toll-like receptor signaling pathway	9.36e-08
path:04010_1	MAPK signaling pathway	1.08e-07
path:04115_1	p53 signaling pathway	4.22e-07
path:03320_1	PPAR signaling pathway	1.49e-06
path:05200_2	Pathways in cancer	4.11e-06
path:04610_1	Complement and coagulation cascades	4.34e-06
path:00260_1	Glycine, serine and threonine metabolism	1.78e-05
path:00280_1	Valine, leucine and isoleucine degradation	1.97e-05
path:04114_1	Oocyte meiosis	0.000240351
path:04666_1	Fc gamma R-mediated phagocytosis	0.000240351
path:00230_1	Purine metabolism	0.000398983
path:04270_2	Vascular smooth muscle contraction	0.000398983
path:04012_1	ErbB signaling pathway	0.000716787
path:04662_1	B cell receptor signaling pathway	0.000784106
path:04350_6	TGF-beta signaling pathway	0.000807613
