# Supplementary material for: Identifying the crosstalk of dysfunctional pathways mediated by lncRNAs in breast cancer subtypes
Source: Royal Society of Chemistry journal article supplement (doi:10.1039/c5mb00700c), 2016-01-04
Supplement: c5mb00700c1.zip [file Supplementary_Table_S5.xlsx]

## Sheet: S5
LumA
Pathways_1	Pathways_2
MAPK signaling pathway	Insulin signaling pathway
MAPK signaling pathway	Chemokine signaling pathway
MAPK signaling pathway	Wnt signaling pathway
MAPK signaling pathway	Pathways in cancer_2
MAPK signaling pathway	Adipocytokine signaling pathway
MAPK signaling pathway	Acute myeloid leukemia
MAPK signaling pathway	Cell cycle
Pathways in cancer_1	Tight junction
Pathways in cancer_1	Cell cycle
Complement and coagulation cascades	Calcium signaling pathway
Insulin signaling pathway	Tight junction
Chemokine signaling pathway	Non-small cell lung cancer
Jak-STAT signaling pathway	Adipocytokine signaling pathway
Jak-STAT signaling pathway	Cell cycle
Prostate cancer	Tight junction
Tight junction	Wnt signaling pathway
Tight junction	p53 signaling pathway
ErbB signaling pathway	Cell cycle
Valine, leucine and isoleucine degradation	Tyrosine metabolism
Wnt signaling pathway	Cell cycle
LumB
Pathways_1	Pathways_2
Pathways in cancer_1	Complement and coagulation cascades
Pathways in cancer_1	Adherens junction
Focal adhesion	Cell cycle
Focal adhesion	Complement and coagulation cascades
Focal adhesion	Basal cell carcinoma
Focal adhesion	Melanogenesis
Focal adhesion	Hedgehog signaling pathway
Tight junction	p53 signaling pathway
Tight junction	Basal cell carcinoma
Tight junction	Fc gamma R-mediated phagocytosis
MAPK signaling pathway	p53 signaling pathway
MAPK signaling pathway	Wnt signaling pathway_1
MAPK signaling pathway	Fc gamma R-mediated phagocytosis
MAPK signaling pathway	Adherens junction
Prostate cancer	Cell cycle
Prostate cancer	Adipocytokine signaling pathway
Cell cycle	Chemokine signaling pathway
T cell receptor signaling pathway	Wnt signaling pathway_1
T cell receptor signaling pathway	Basal cell carcinoma
ECM-receptor interaction_2	Regulation of actin cytoskeleton
Insulin signaling pathway	Adherens junction
ErbB signaling pathway	Wnt signaling pathway_1
ErbB signaling pathway	Basal cell carcinoma
ErbB signaling pathway	Wnt signaling pathway_3
ErbB signaling pathway	Hedgehog signaling pathway
Acute myeloid leukemia	Basal cell carcinoma
Small cell lung cancer	Cell adhesion molecules (CAMs)
Chemokine signaling pathway	Hedgehog signaling pathway
Chemokine signaling pathway	Purine metabolism
Neurotrophin signaling pathway	Basal cell carcinoma
Neurotrophin signaling pathway	Hedgehog signaling pathway
Tyrosine metabolism	Cysteine and methionine metabolism
Regulation of actin cytoskeleton	Wnt signaling pathway_3
Her2
Pathways_1	Pathways_2
Focal adhesion	Cell cycle
Focal adhesion	PPAR signaling pathway
Focal adhesion	Complement and coagulation cascades
Focal adhesion	Pathways in cancer_2
Cell cycle	Pathways in cancer_1
Cell cycle	MAPK signaling pathway
Cell cycle	ErbB signaling pathway
Cell cycle	Insulin signaling pathway
Cell cycle	Regulation of actin cytoskeleton
Cell cycle	Glioma
Pathways in cancer_1	Oocyte meiosis
Pathways in cancer_1	TGF-beta signaling pathway
Complement and coagulation cascades	p53 signaling pathway
MAPK signaling pathway	Pathways in cancer_2
MAPK signaling pathway	Acute myeloid leukemia
MAPK signaling pathway	Adherens junction
MAPK signaling pathway	Oocyte meiosis
Prostate cancer	ECM-receptor interaction
Prostate cancer	Pathways in cancer_3
Fc gamma R-mediated phagocytosis	Tight junction
Chemokine signaling pathway	Pathways in cancer_2
Chemokine signaling pathway	ECM-receptor interaction
Chemokine signaling pathway	Axon guidance
Pathways in cancer_2	ErbB signaling pathway
Pathways in cancer_2	Regulation of actin cytoskeleton
Pathways in cancer_2	Tight junction
Pathways in cancer_2	Glycosphingolipid biosynthesis - lacto and neolacto series
Pathways in cancer_2	Pathways in cancer_3
ErbB signaling pathway	ECM-receptor interaction
ErbB signaling pathway	Acute myeloid leukemia
ErbB signaling pathway	Pathways in cancer_3
Wnt signaling pathway	Regulation of actin cytoskeleton
Insulin signaling pathway	TGF-beta signaling pathway
Regulation of actin cytoskeleton	Acute myeloid leukemia
Regulation of actin cytoskeleton	Oocyte meiosis
Regulation of actin cytoskeleton	Pathways in cancer_3
Tight junction	Acute myeloid leukemia
Tight junction	Glycosphingolipid biosynthesis - lacto and neolacto series
Tight junction	T cell receptor signaling pathway
Axon guidance	Acute myeloid leukemia
Acute myeloid leukemia	Glycosphingolipid biosynthesis - lacto and neolacto series
Acute myeloid leukemia	Pathways in cancer_3
Acute myeloid leukemia	T cell receptor signaling pathway
Pathways in cancer_3	Glioma
Basal-like
Pathways_1	Pathways_2
Cell cycle	Focal adhesion
Cell cycle	Pathways in cancer
Chemokine signaling pathway	PPAR signaling pathway
Chemokine signaling pathway	Complement and coagulation cascades
Chemokine signaling pathway	TGF-beta signaling pathway
Focal adhesion	p53 signaling pathway
MAPK signaling pathway	Oocyte meiosis
p53 signaling pathway	Pathways in cancer
PPAR signaling pathway	Pathways in cancer
Pathways in cancer	Complement and coagulation cascades
Pathways in cancer	Oocyte meiosis
Pathways in cancer	TGF-beta signaling pathway
