# Supplementary material for: Identifying the crosstalk of dysfunctional pathways mediated by lncRNAs in breast cancer subtypes
Source: Royal Society of Chemistry journal article supplement (doi:10.1039/c5mb00700c), 2016-01-04
Supplement: c5mb00700c1.zip [file Supplementary_Table_S6.xlsx]

## Sheet: LumA_超几何结果
Key lncRNAs mediated the pathway crosstalk pairs in each subtype
LumA	LumB	Her2	Basal-like
AC053503.4	CTD-2525I3.6	CHL1-AS1	AF131216.6
CASC16	LIFR-AS1	MIR143HG	DIAPH3-AS1
RP11-161M6.2	NCAM1-AS1	RP11-266O8.1	EMX2OS
MIR155HG	RP11-35G9.3	RP11-31F15.2	RP11-588H23.3
DIAPH3-AS1	RP11-385J1.2	RP11-35J10.5	RP11-822E23.8
RP11-57A19.2	RP11-87H9.3	RP11-445F12.1	LINC00460
RP5-1100I6.2	RP1-1J6.2	RP11-494M8.4	LINC00964
PSORS1C3	AC005355.2	RP11-576I22.2	MYLK-AS1
CERS6-AS1	AC091969.1	RP11-792D21.2	OIP5-AS1
CHKB-AS1	APCDD1L-AS1	RP4-799P18.2	RNF144A-AS1
MEG3	LINC00514	TFAP2A-AS1	RP11-381O7.3
AC226118.1	NR2F2-AS1	CTC-510F12.4	RP11-77H9.2
	RP11-2C24.4	CTD-2319I12.1	Z83844.1
	RP11-390F4.3	RP11-600K15.1	RP11-696N14.1
	RP11-480I12.7	RP4-668G5.1	MIR143HG
	RP11-558F24.4	SNHG17	AC010982.1
			CYP4F8
