# Supplementary figures and images for: Identifying the crosstalk of dysfunctional pathways mediated by lncRNAs in breast cancer subtypes
Source: Royal Society of Chemistry journal article supplement (doi:10.1039/c5mb00700c), 2016-01-04

A Luma

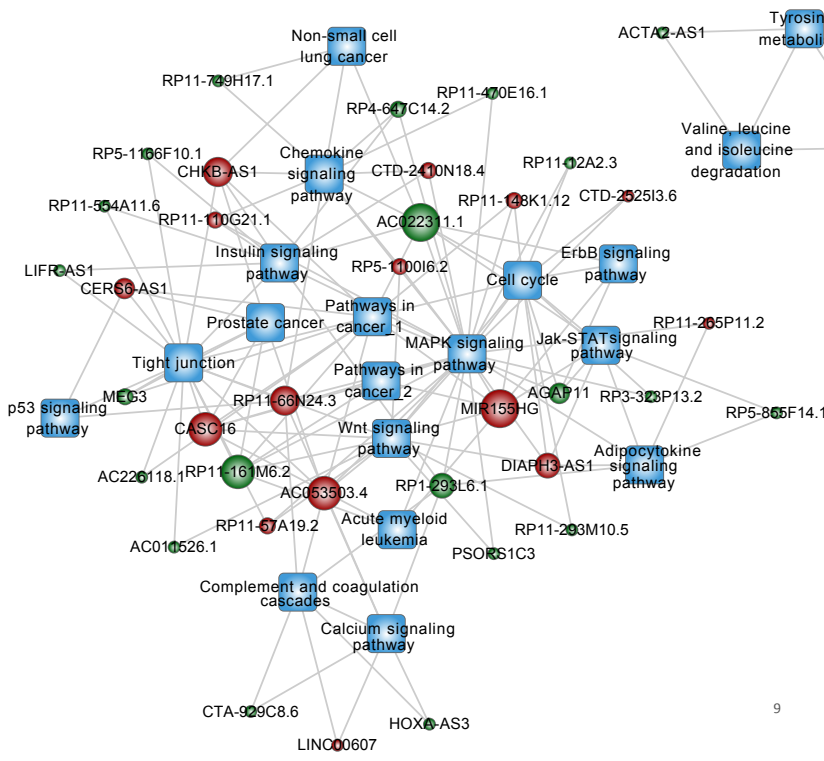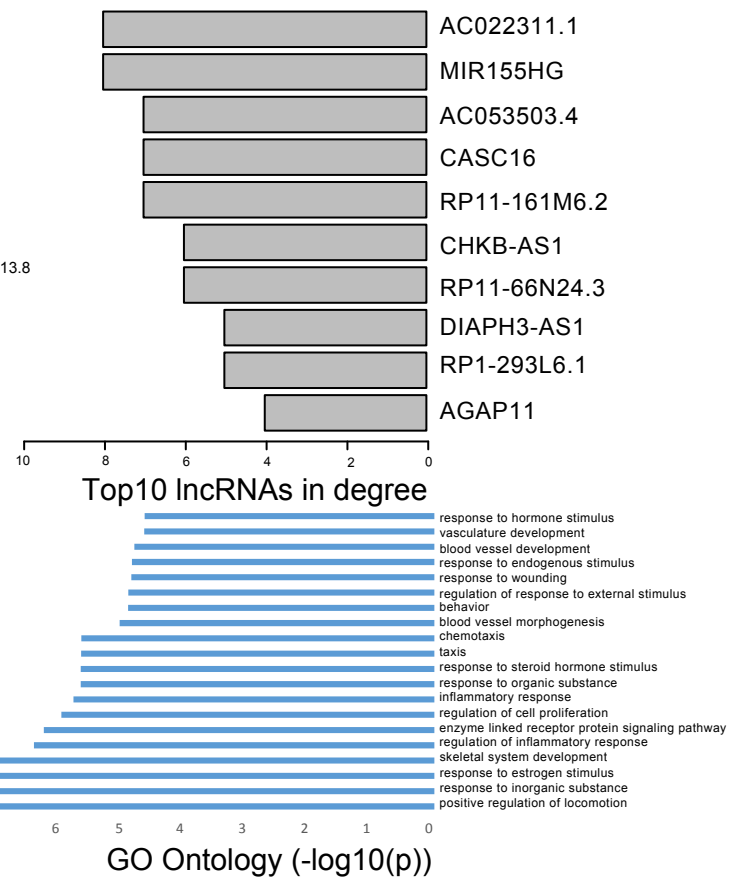

B Her2

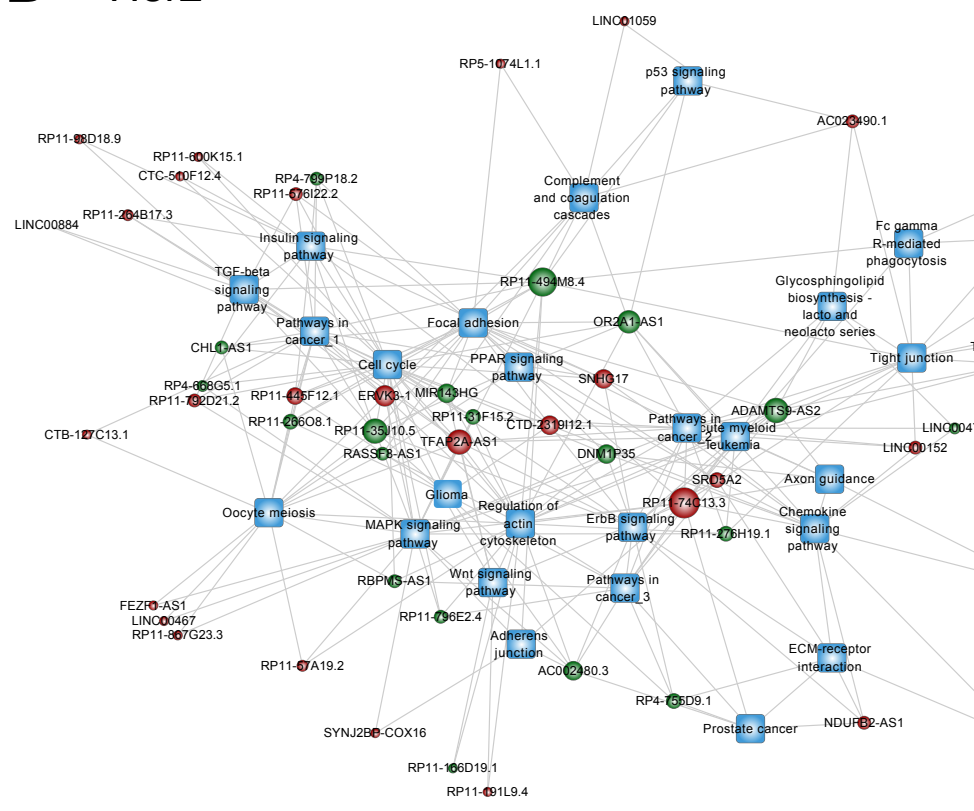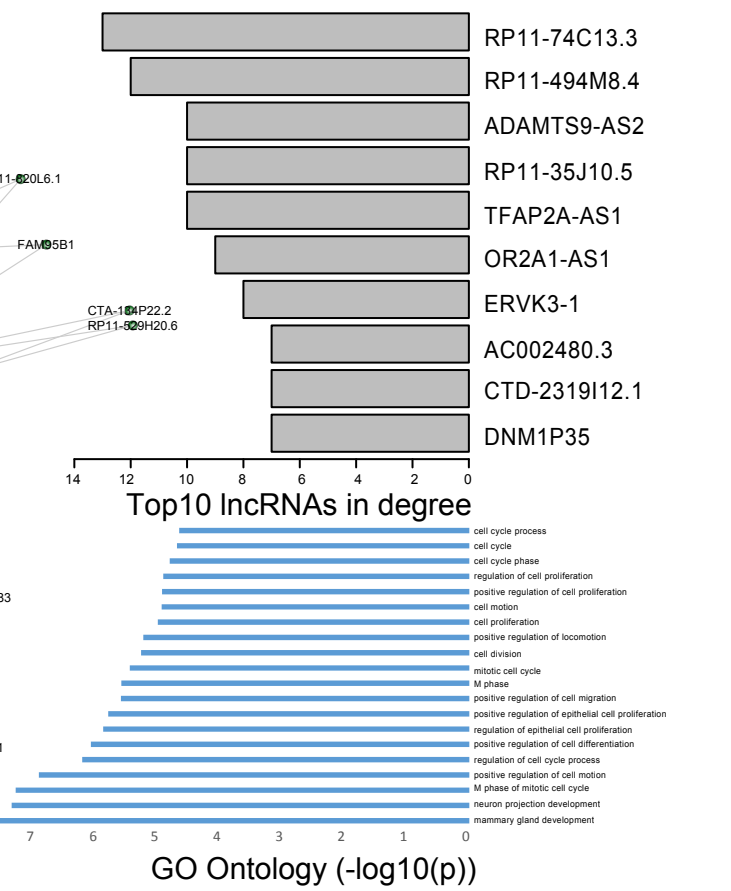

Supplement: c5mb00700c1.zip [file Supplementary_FigureS1.pdf › Supplementary_FigureS1.pdf]

## A LumA

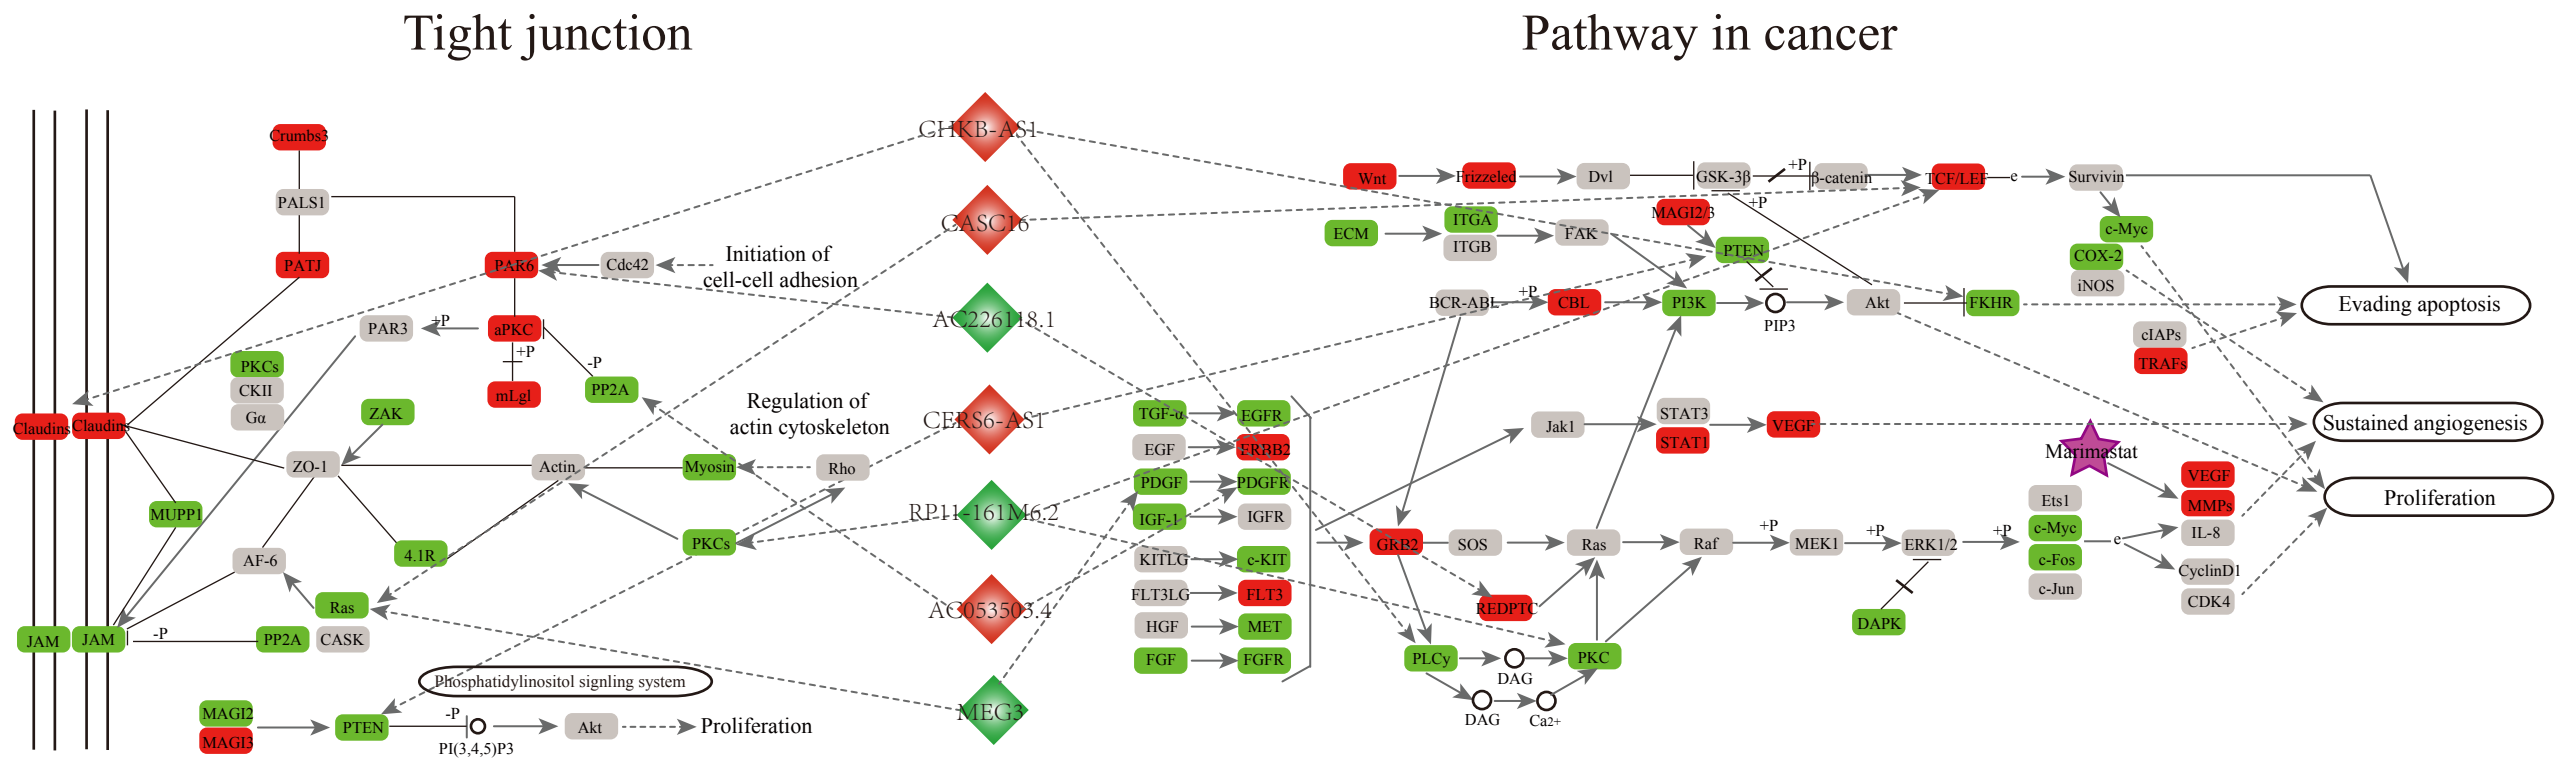

## B Her2

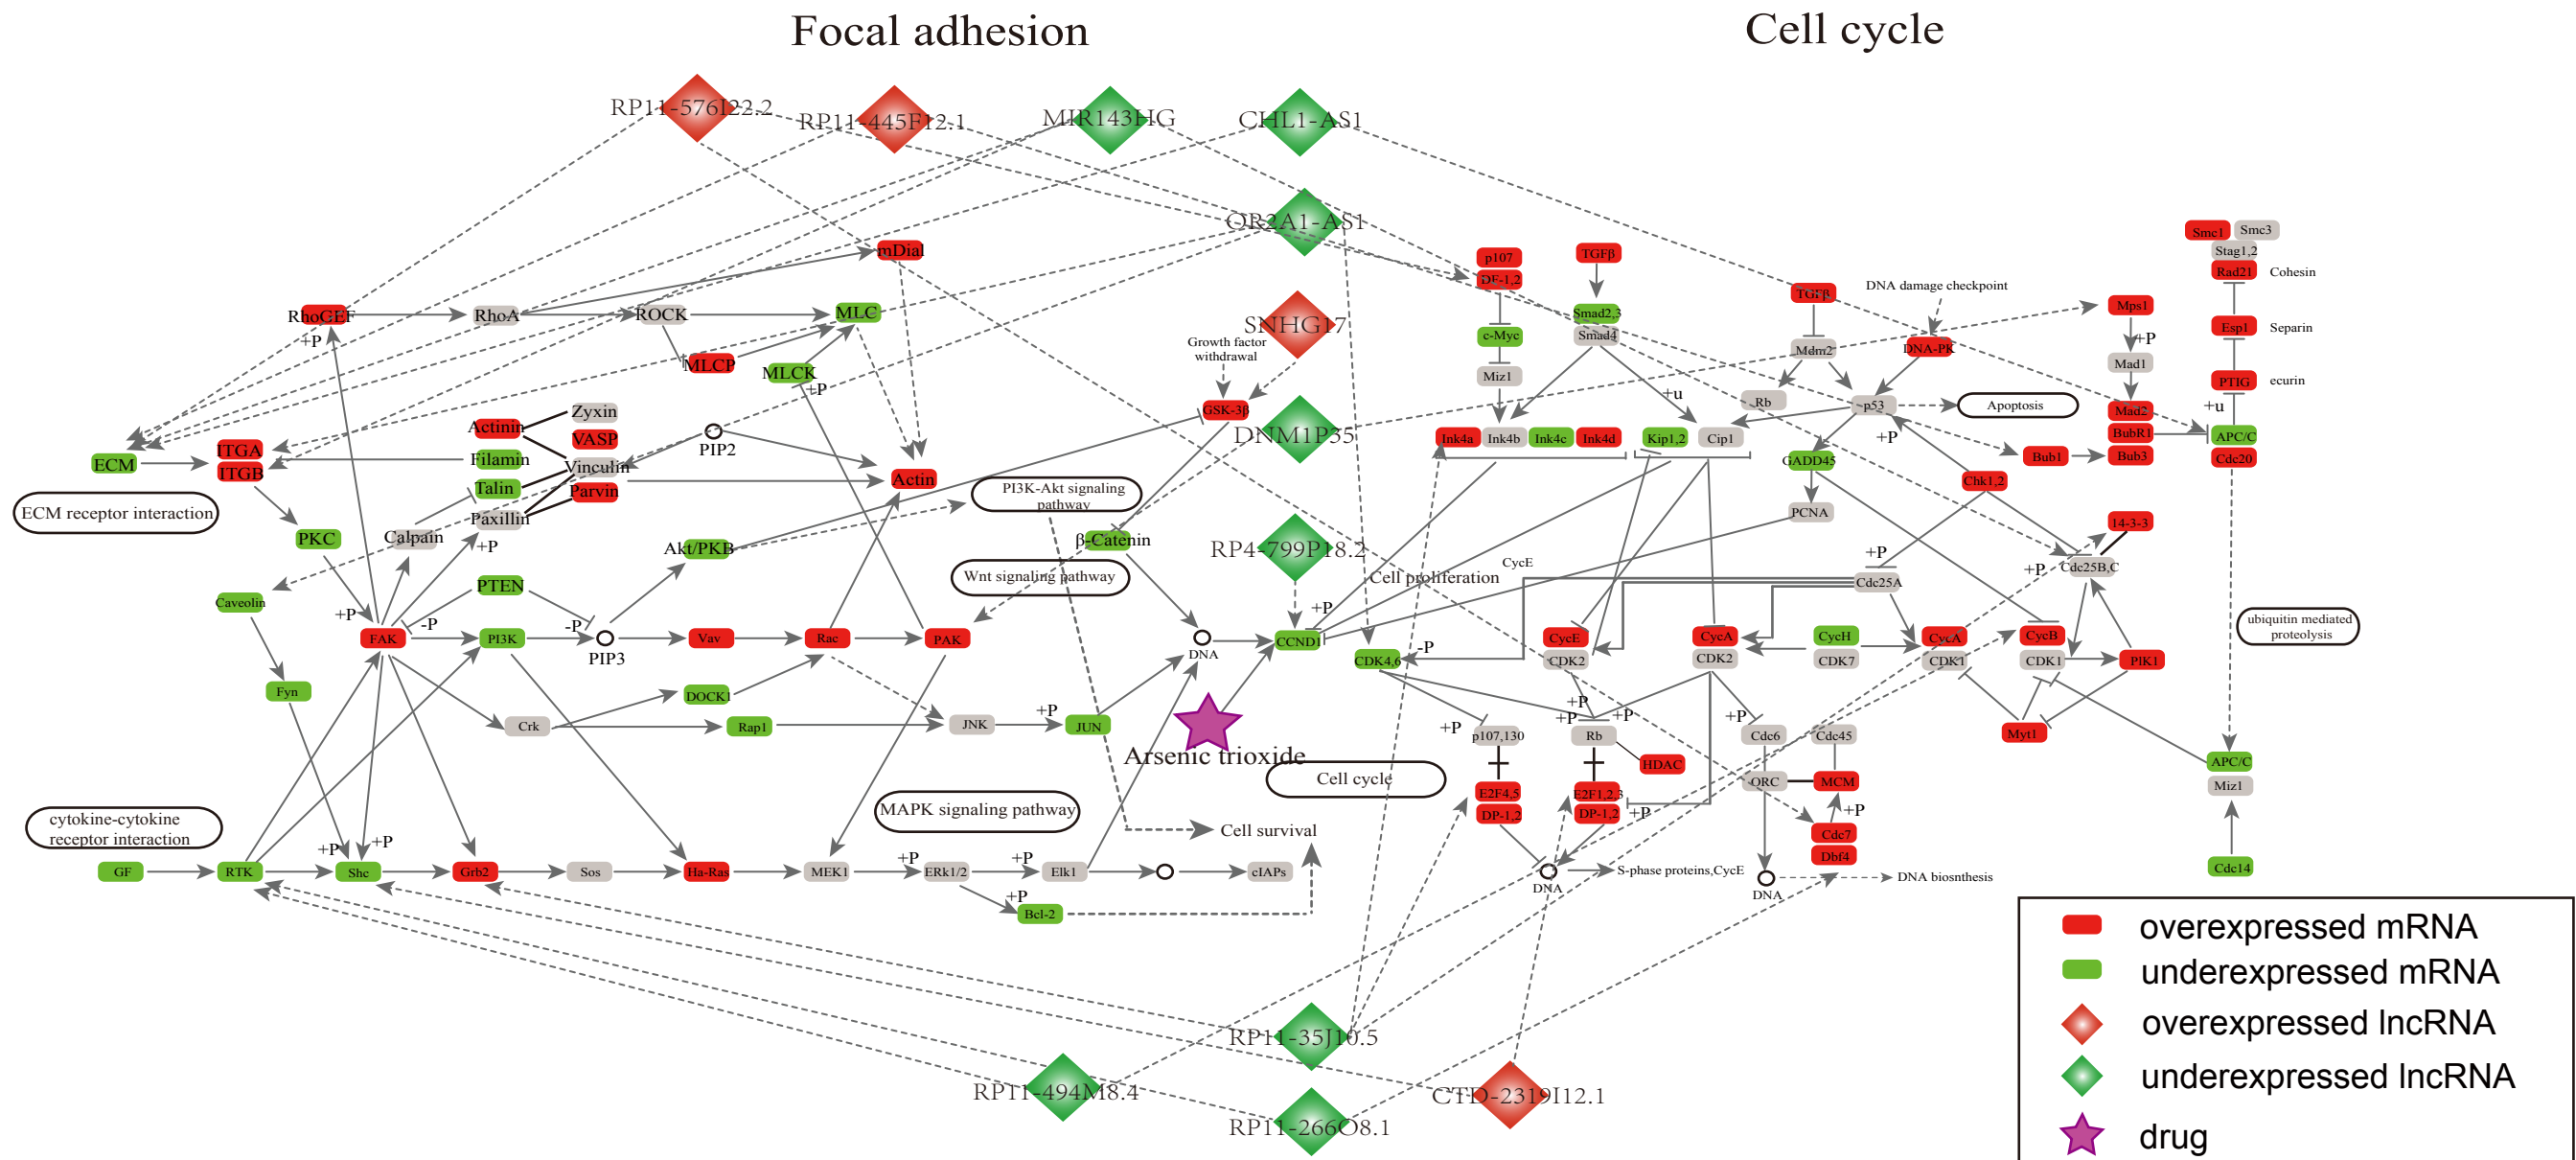

Supplement: c5mb00700c1.zip [file Supplementary_FigureS2.pdf › Supplementary_FigureS2.pdf]

A LumA

Prostate cancer

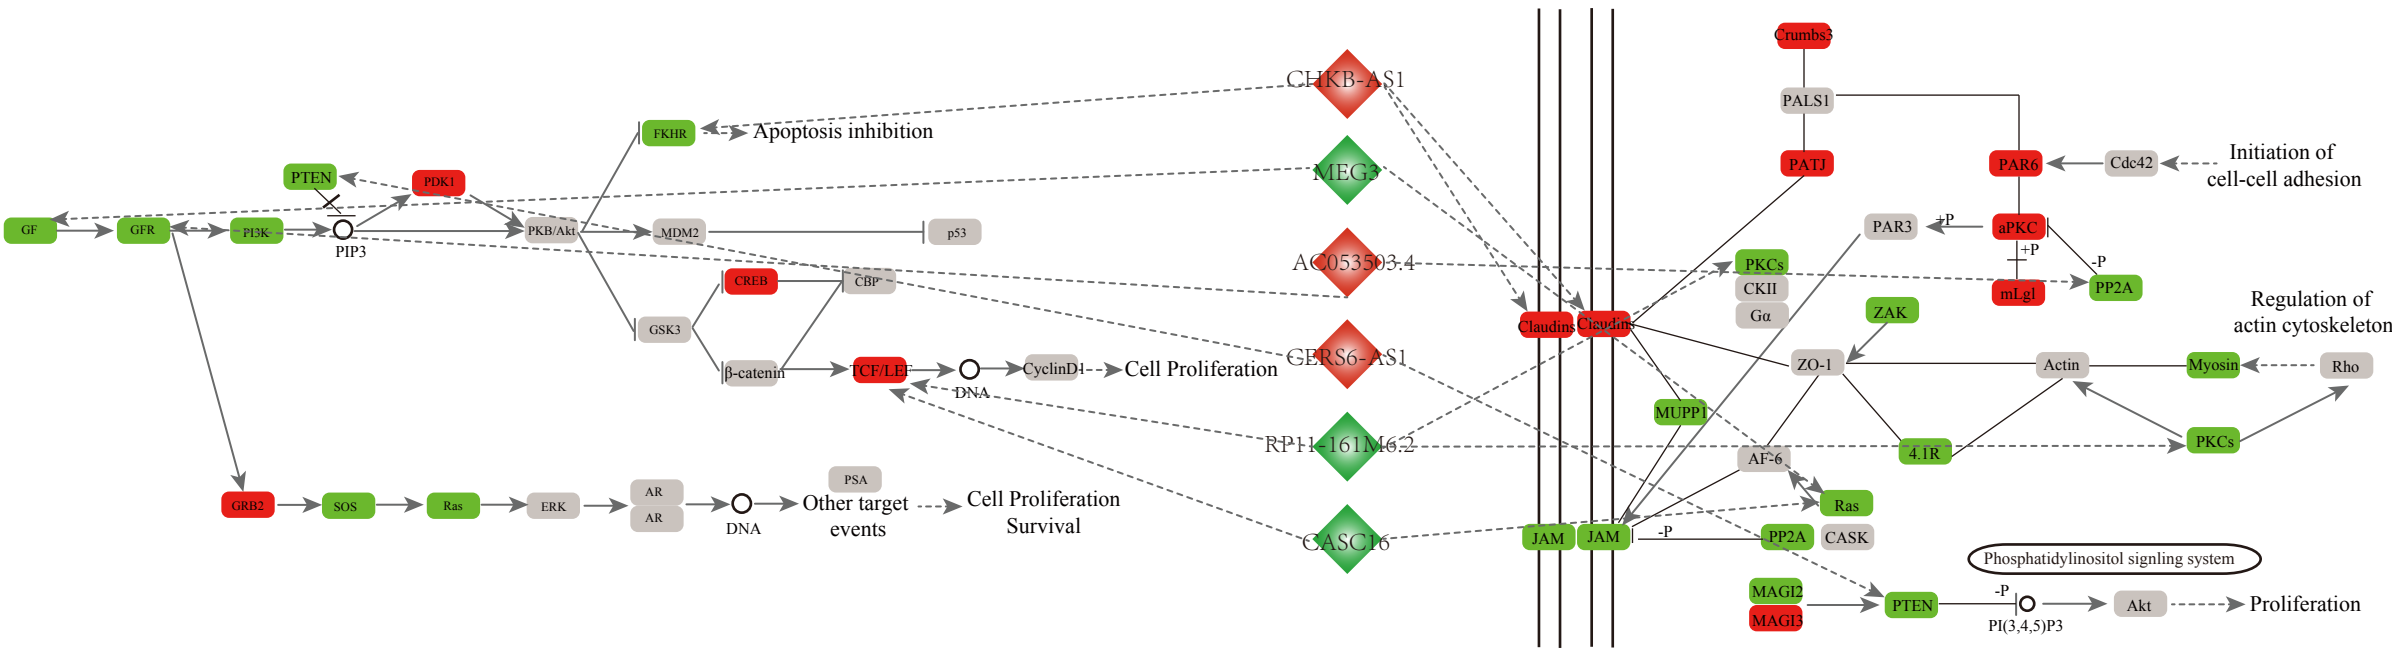

B LumA

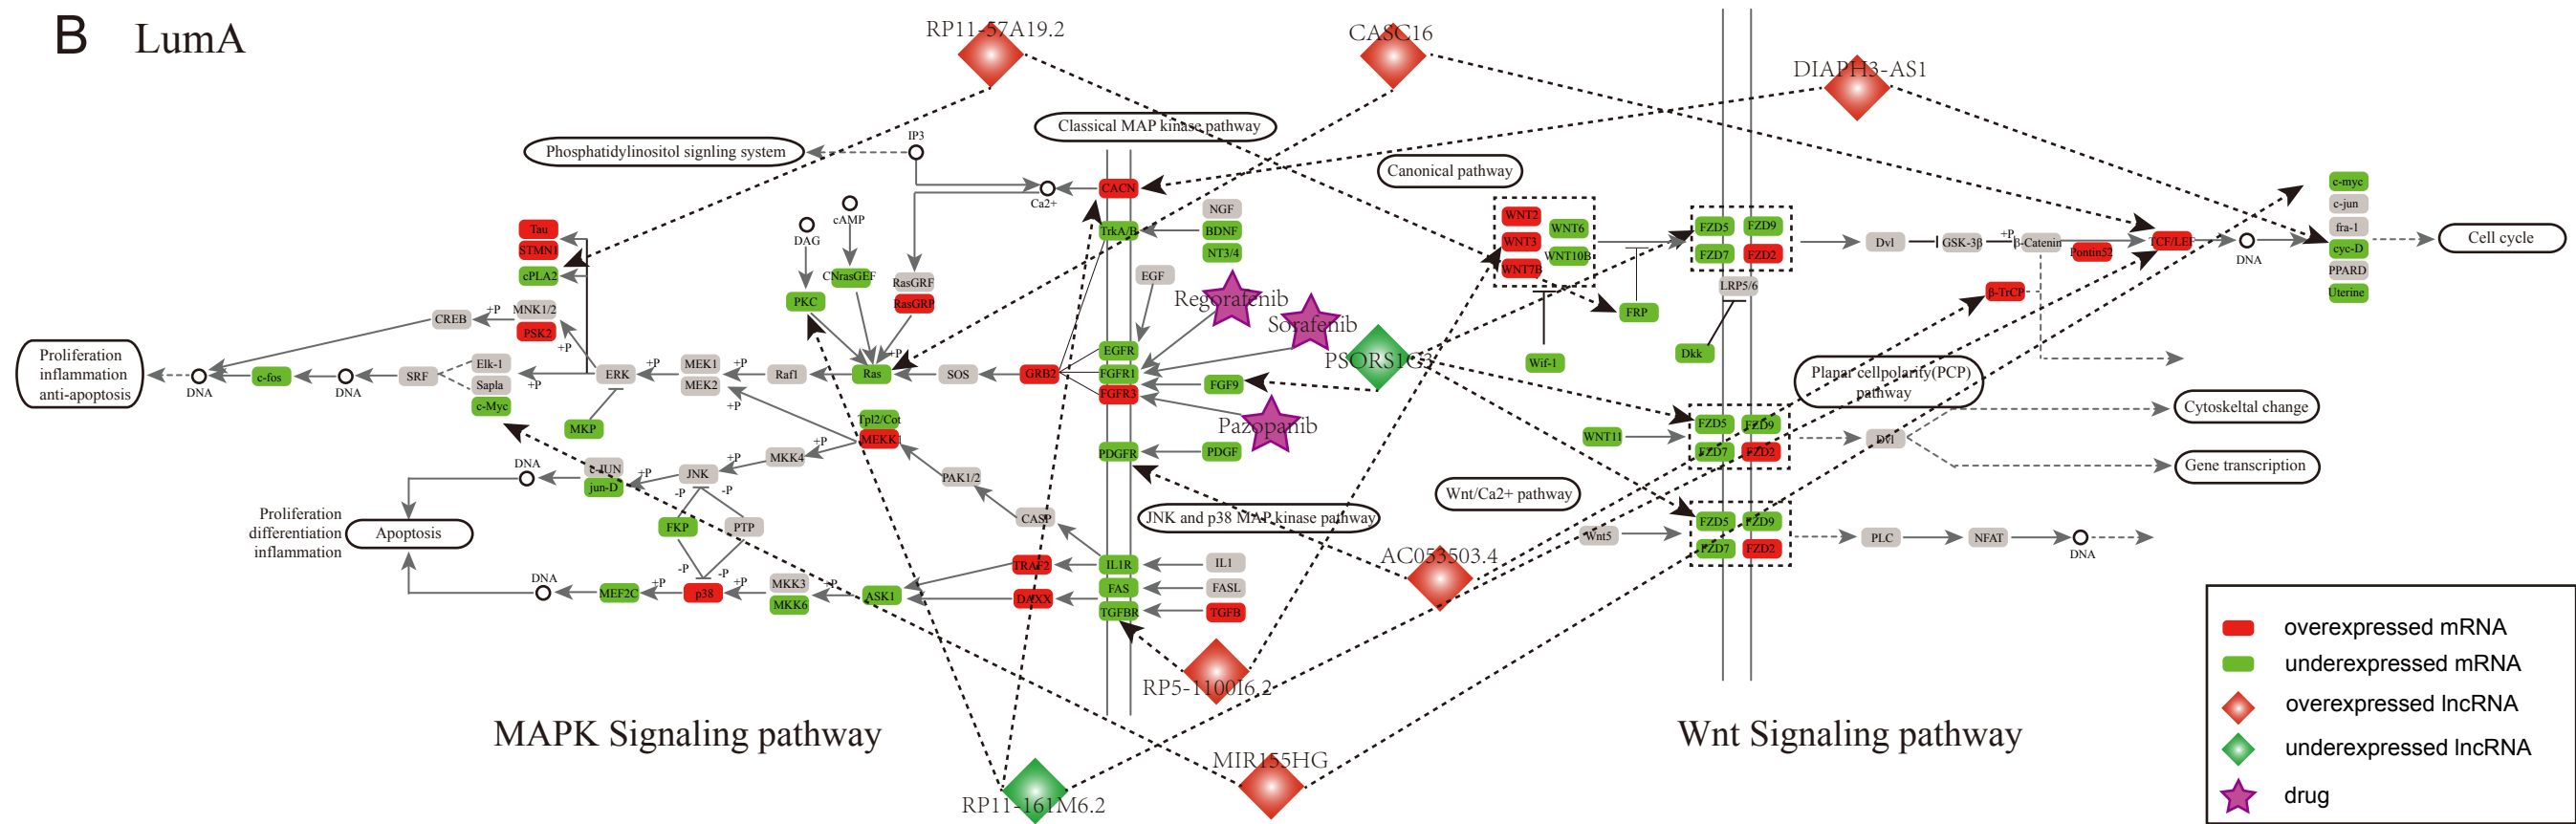

Supplement: c5mb00700c1.zip [file Supplementary_FigureS3.pdf › Supplementary_FigureS3.pdf]

A

LumB

ERBB Signaling pathway

Wnt Signaling pathway

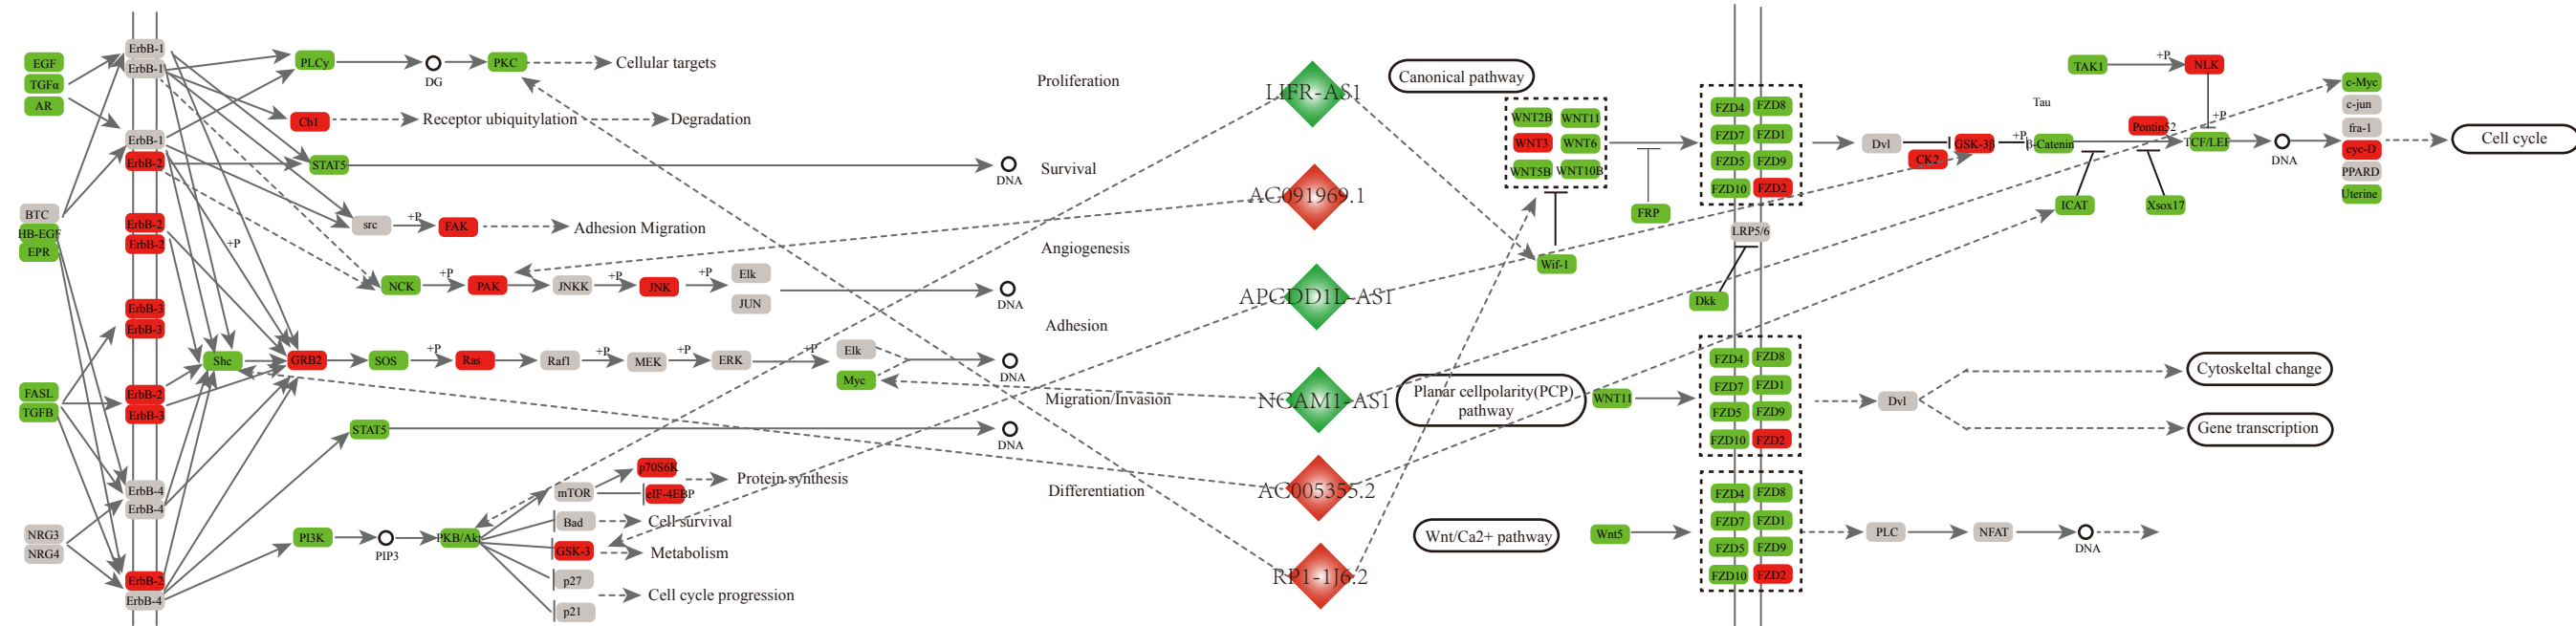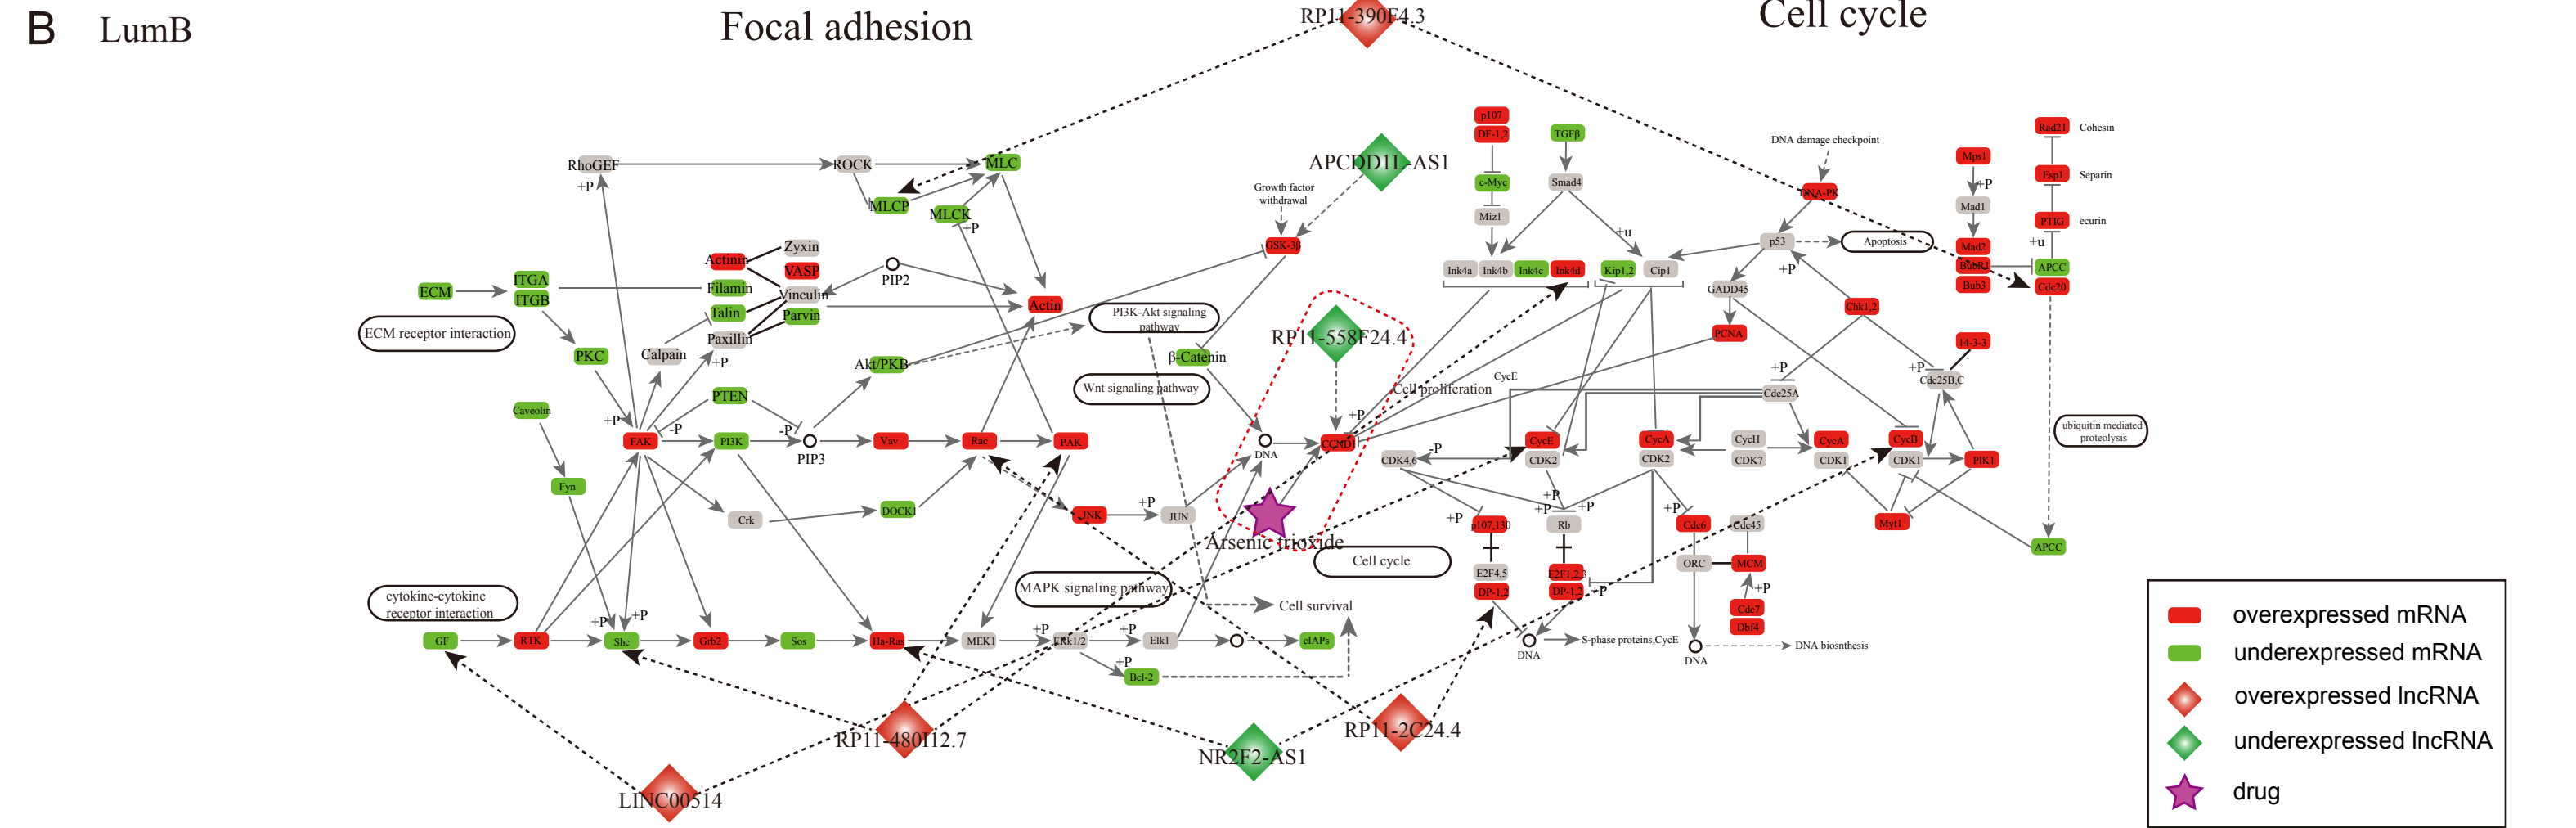

Supplement: c5mb00700c1.zip [file Supplementary_FigureS4.pdf › Supplementary_FigureS4.pdf]

A Her2

Pathway in cancer

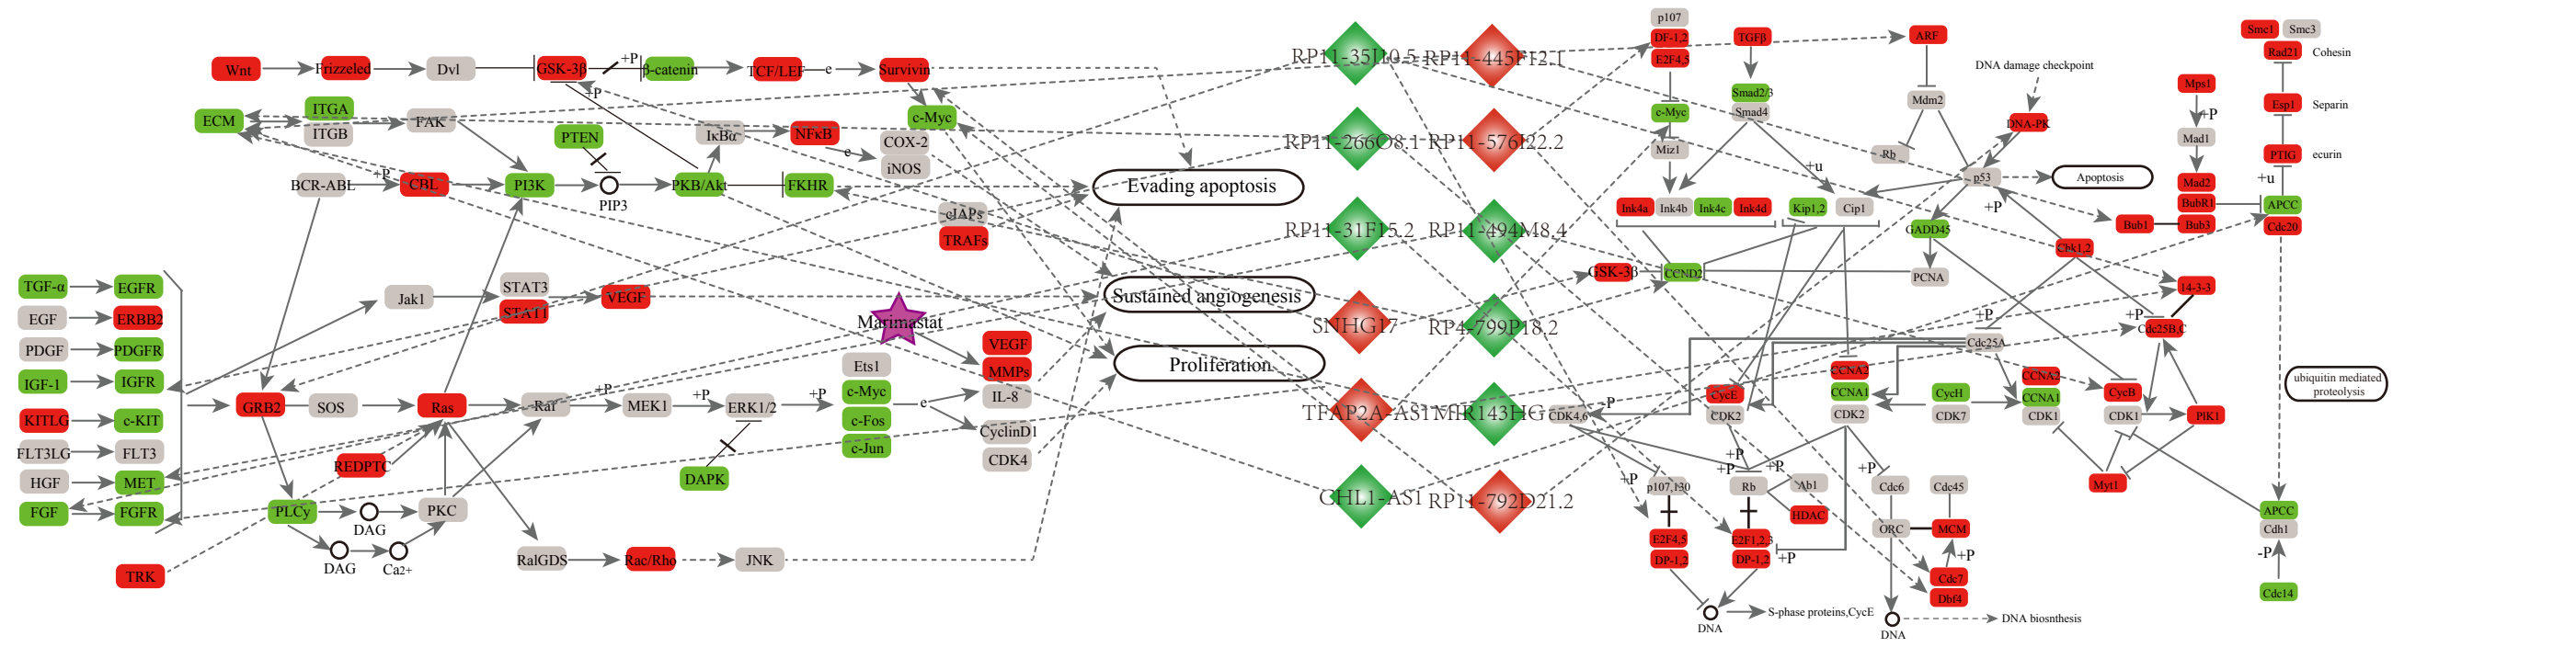

B Her2

Insulin Signaling pathway

Cell cycle

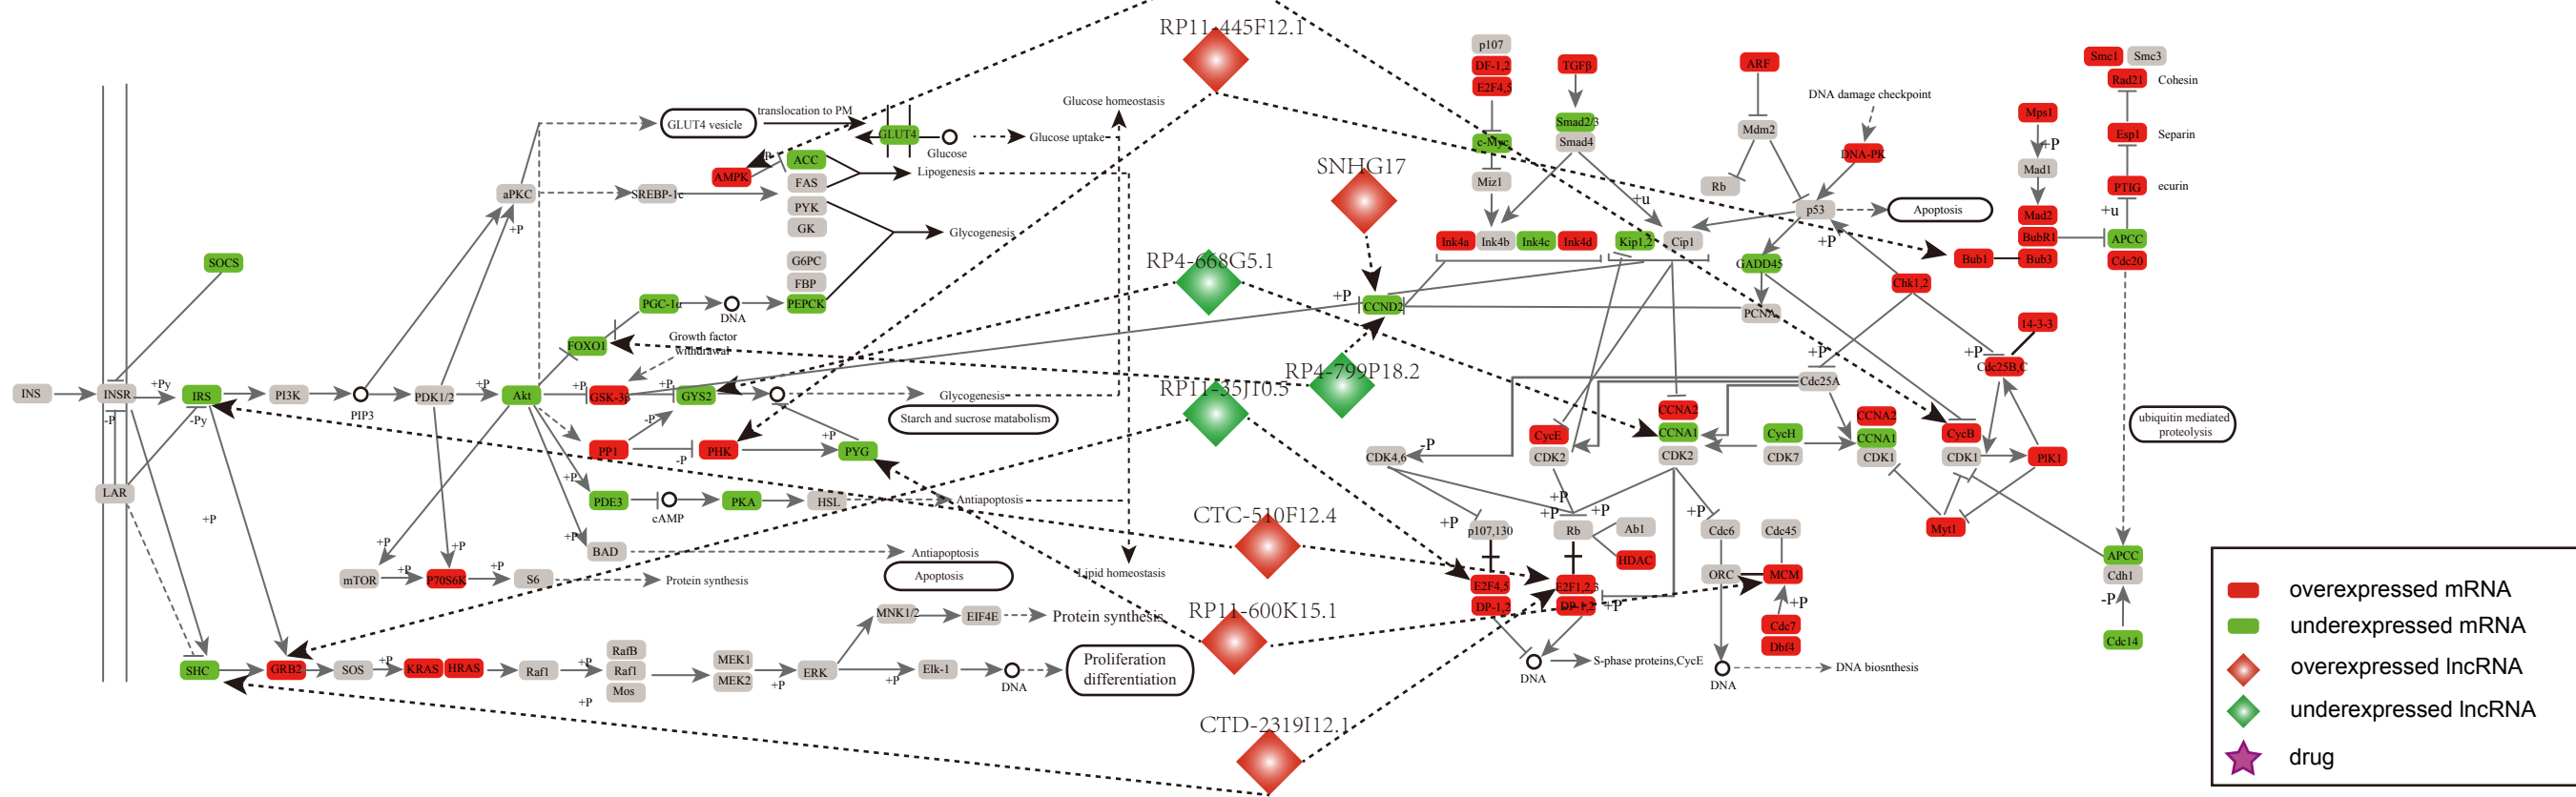

Supplement: c5mb00700c1.zip [file Supplementary_FigureS5.pdf › Supplementary_FigureS5.pdf]
